# Supplementary material for: Maternal sitagliptin treatment attenuates offspring glucose metabolism and intestinal proinflammatory cytokines IL-6 and TNF-α expression in male rats
Source: PeerJ. 2020 Nov 11;8:e10310. doi: 10.7717/peerj.10310 (PMC7666563; doi:10.7717/peerj.10310)
Supplement: Supplemental Information 1 [file peerj-08-10310-s001.xlsx]

## Sheet: maternal
female rat	dam weight gain during pregnancy week 3 (g)	FBG at weaning time (mmol/L)	food intake during pregnancy (g/week)	energy intake (kcal/week)
ND-1	145	4.7	155	596.75
ND-2	73	4.3	131	504.35
ND-3	119	5.1	111	427.35
ND-4	94	4.8	148	569.8
ND-5	98	5	131	504.35
ND-6	129	4.9	137	527.45
ND-7	71	5	129	496.65
ND-8	173	4.8	143	550.55
ND-sitagliptin-1	124	4.8	144	554.4
ND-sitagliptin-2	162	4.5	141	542.85
ND-sitagliptin-3	74	5	138	531.3
ND-sitagliptin-4	130	5.1	143	550.55
ND-sitagliptin-5	114	5.3	140	539
ND-sitagliptin-6	140	4.7	141	542.85
ND-sitagliptin-7	126	5.9	152	585.2
ND-sitagliptin-8	130	5.1	134	515.9
HFD-1	166	6.9	127	600.71
HFD-2	141	6.4	117	553.41
HFD-3	150	7	127	600.71
HFD-4	196	6.4	137	648.01
HFD-5	125	5.9	142	671.66
HFD-6	188	6.2	128	605.44
HFD-7	155	5.8	138	652.74
HFD-8	182	6.4	134	633.82
HFD-sitagliptin-1	136	5.2	138	652.74
HFD-sitagliptin-2	136	4.9	114	539.22
HFD-sitagliptin-3	86	5.7	107	506.11
HFD-sitagliptin-4	127	6	121	572.33
HFD-sitagliptin-5	80	5.8	134	633.82
HFD-sitagliptin-6	125	5.3	124	586.52
HFD-sitagliptin-7	106	5.2	117	553.41
HFD-sitagliptin-8	107	5.8	108	510.84

## Sheet: male offspring
male rat	birth weight (g)	body weight at weaning time (g)	FBG at weanig time (mmol/L)	BG at 30' (mmol/L)	BG at 60' (mmol/L)	BG at 120' (mmol/L)	AUC (mmol/L/h)	insulin(ng/mL)	HOMA-IR	serum IL-6(pg/mL)	serum IL-10(pg/mL)	serum TNF-a (pg/mL)
ND-1	6.8	48	4.6	8.9	6.3	5.4	13.025	0.83	3.5974	47	24	154
ND-2	6.7	51	5.2	7.6	5.8	5.1	12	0.74	3.62567	59	39	241
ND-3	6.9	53	4.8	7	5.3	5.8	11.575	0.69	3.12064	61	24	184
ND-4	7.3	57	5	8.4	6.8	6.2	13.65	0.45	2.12	38	31	213
ND-5	6.5	58	4.3	8.3	5.3	5.7	12.05	0.75	3.03867	78	27	195
ND-6	6	48	5.2	7.5	6.4	6.3	13	0.53	2.59676	39	4	218
ND-7	7.7	50	5.6	8.3	5.6	5.8	12.65	0.79	4.16839	49	15	160
ND-8	6.9	45	4.8	7.5	6.3	6	12.675	0.47	2.12565	95	20	284
ND-sitagliptin-1	7.1	44	6.1	9	7.3	6.5	14.75	0.61	3.50601	57	29	301
ND-sitagliptin-2	6.5	46	4.9	7.9	7	6.4	13.625	0.57	2.63163	82	15	218
ND-sitagliptin-3	6.4	58	4.2	8.5	6.4	5.4	12.8	0.49	1.93909	39	17	251
ND-sitagliptin-4	7.6	51	5.1	8.1	6.1	5.5	12.65	0.51	2.45072	81	26	195
ND-sitagliptin-5	6.1	59	5.6	7.6	6.1	5.2	12.375	0.48	2.53269	91	21	152
ND-sitagliptin-6	7.2	56	4.3	9.1	5.9	5.1	12.6	0.55	2.22836	58	38	139
ND-sitagliptin-7	6.7	60	4.8	7.4	5.1	5	11.225	0.63	2.84928	34	16	210
ND-sitagliptin-8	6.1	56	5.8	8.3	6.9	6.1	13.825	0.71	3.88007	86	19	168
HFD-1	7.4	63	6.4	13.6	10.3	6.8	19.525	1.32	7.95989	754	16	427
HFD-2	6.3	60	6.8	14.3	9.5	7.4	19.675	1.37	8.77774	582	8	574
HFD-3	7.8	58	6.4	13.2	8.9	6.9	18.325	1.25	7.53778	691	28	395
HFD-4	6.9	55	5.6	14.7	8.4	7.1	18.6	1.17	6.17344	415	41	582
HFD-5	7	67	5.2	12	9.4	7	17.85	1.08	5.29152	651	38	486
HFD-6	6.9	55	6.8	13.6	8.7	6.9	18.475	1.21	7.7526	795	24	512
HFD-7	7.1	63	5.9	14.6	9.3	5.7	18.6	1.39	7.72716	494	18	475
HFD-8	7.2	60	6.7	15.8	7.8	7.5	19.175	1.28	8.0805	516	31	563
HFD-sitagliptin-1	7.6	53	4.8	8.6	6.4	5.8	13.2	0.83	3.75381	254	17	318
HFD-sitagliptin-2	7.5	55	5	10.3	7.3	6.2	14.975	0.84	3.95733	342	26	416
HFD-sitagliptin-3	7.3	45	4.3	12.4	6.1	5.1	14.4	0.67	2.71454	162	34	295
HFD-sitagliptin-4	6	58	5.8	11.5	7.4	6.4	15.95	0.73	3.98937	267	21	543
HFD-sitagliptin-5	7.3	52	5.3	10.4	6.8	5.9	14.575	0.64	3.19602	365	16	257
HFD-sitagliptin-6	6.8	48	4.9	13.2	7.2	6.3	16.375	0.7	3.23182	473	17	334
HFD-sitagliptin-7	7.2	52	5.3	10.4	6.8	6.8	15.025	0.69	3.44571	364	26	286
HFD-sitagliptin-8	7.9	48	4.8	11.4	7.1	6.3	15.375	0.64	2.89451	294	34	419

## Sheet: female offspring
female rat	birth weight (g)	body weight at weaning time (g)	FBG at weanig time (mmol/L)	BG at 30' (mmol/L)	BG at 60' (mmol/L)	BG at 120' (mmol/L)	AUC (mmol/L/h)	insulin(ng/mL)	HOMA-IR
ND-1	6.3	53	5.1	7.6	7.1	5.6	13.2	0.57	2.73904
ND-2	6.8	37	4.3	8.1	6.5	5.1	12.55	0.61	2.47145
ND-3	7	46	4.1	7.3	7.4	6.2	13.325	0.48	1.85429
ND-4	6.4	51	4	7.5	6.3	5.4	12.175	0.52	1.95982
ND-5	6.7	50	5.3	8.6	7.2	6.2	14.125	0.63	3.14608
ND-6	7.1	48	4.3	9.5	5.8	5.3	12.825	0.59	2.39042
ND-7	6.5	53	5.1	9.5	5.9	5.4	13.15	0.41	1.97019
ND-8	6.8	47	4.1	10.5	7.1	6.1	14.65	0.51	1.97019
ND-sitagliptin-1	7	48	4.6	8.5	7.1	5.9	13.675	0.54	2.34048
ND-sitagliptin-2	6.8	52	5.2	9.6	8.6	7.1	16.1	0.47	2.30279
ND-sitagliptin-3	6.3	50	4.3	8.9	7.4	6.4	14.275	0.41	1.66114
ND-sitagliptin-4	7.1	48	4.5	9.1	7.4	5.9	14.175	0.42	1.7808
ND-sitagliptin-5	6.5	41	4.7	8.4	7.4	6.2	14.025	0.43	1.90423
ND-sitagliptin-6	7.2	52	5.1	9.6	8.1	6.9	15.6	0.71	3.41179
ND-sitagliptin-7	7.3	57	5	8.1	6.8	5.4	13.1	0.62	2.92089
ND-sitagliptin-8	6.8	53	4.6	7.6	5.9	5.1	11.925	0.58	2.51385
HFD-1	6.9	65	4.8	7.8	7.1	6.2	13.525	0.68	3.07541
HFD-2	6.8	58	4.7	7.9	6.8	6	13.225	0.53	2.34708
HFD-3	7.1	65	4.6	8.2	6.9	5.9	13.375	0.62	2.68722
HFD-4	7	63	4.9	9.4	7.1	6.5	14.5	0.42	1.93909
HFD-5	6.8	64	5.1	10.5	8.9	7.6	17	0.68	3.26763
HFD-6	7.2	59	5	11.1	9.1	8.5	17.875	0.55	2.59111
HFD-7	7.1	61	4.5	8.6	7.3	6.1	13.95	0.45	1.908
HFD-8	6.8	57	4.9	7.4	7.1	6.9	13.7	0.53	2.44695
HFD-sitagliptin-1	7.6	51	4.8	8.6	6.9	5.9	13.625	0.64	2.89451
HFD-sitagliptin-2	7.1	53	4.4	8.5	5.5	4.9	11.925	0.64	2.6533
HFD-sitagliptin-3	7	51	4.8	7.6	6.4	6.1	12.85	0.55	2.48747
HFD-sitagliptin-4	6.5	48	5.6	10.6	9.1	7.6	17.325	0.64	3.37692
HFD-sitagliptin-5	7.3	45	5.1	9.6	7.9	6.2	15.1	0.69	3.31568
HFD-sitagliptin-6	6.8	47	4.8	11.5	8.6	7.9	17.35	0.52	2.35179
HFD-sitagliptin-7	6.4	46	4.9	10.8	8.6	7.8	16.975	0.63	2.90864
HFD-sitagliptin-8	7.2	47	5.6	9.6	7.9	6.2	15.225	0.51	2.69099
